# Supplementary material for: Novel bakuchiol derivatives inhibit the migration and invasion of non-small cell lung cancer by suppressing epithelial-to-mesenchymal transition
Source: Royal Society of Chemistry journal article supplement (doi:10.1039/d5ra04625d), 2025-01-01

**Heart-Ctrl:**

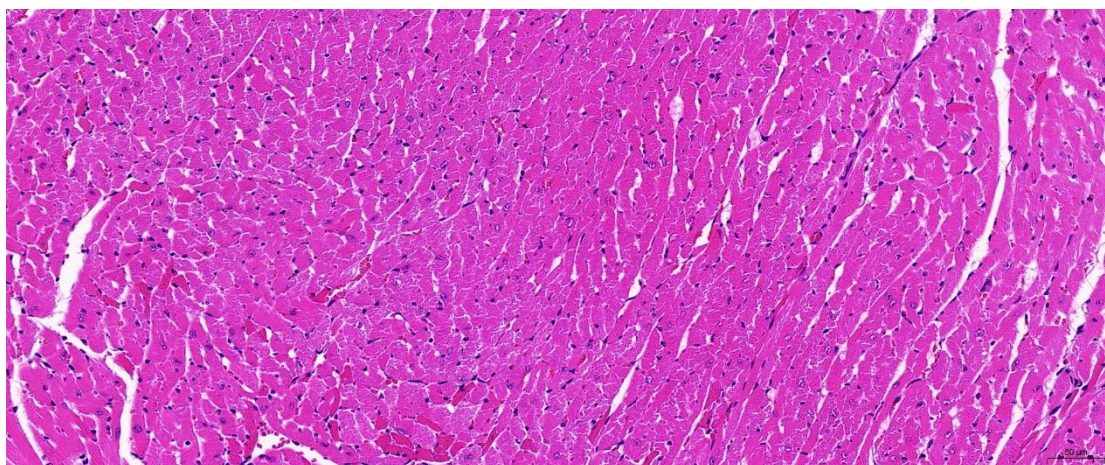

**Heart-DDP:**

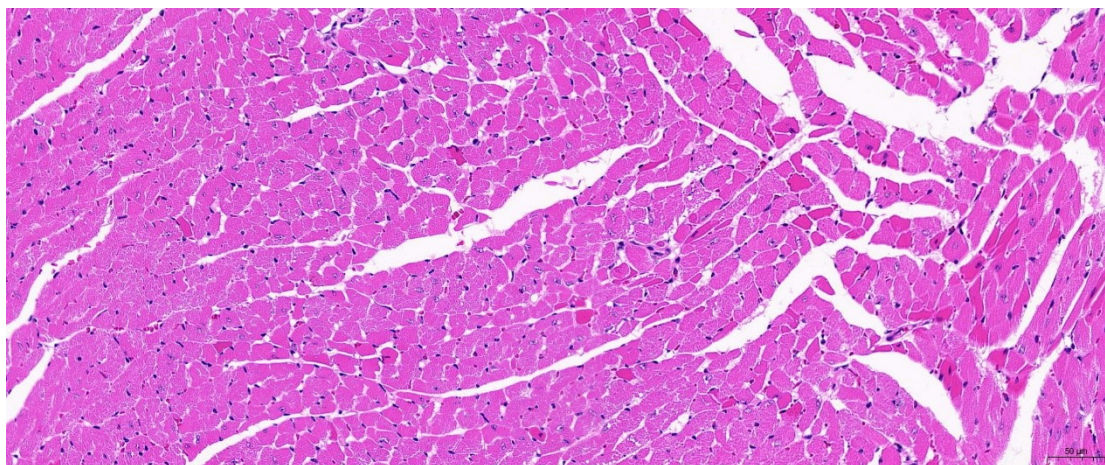

**Heart-compound 2f:**

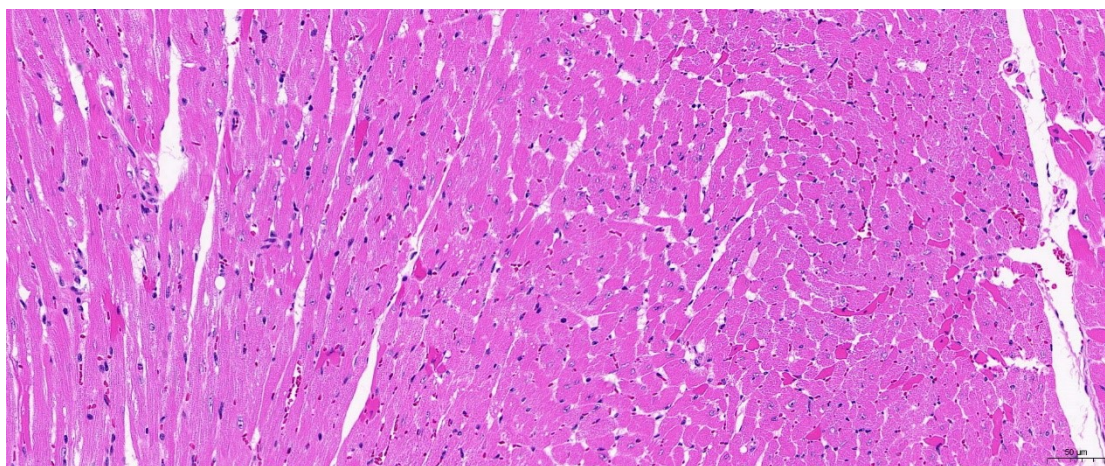



**Liver-Ctrl:**

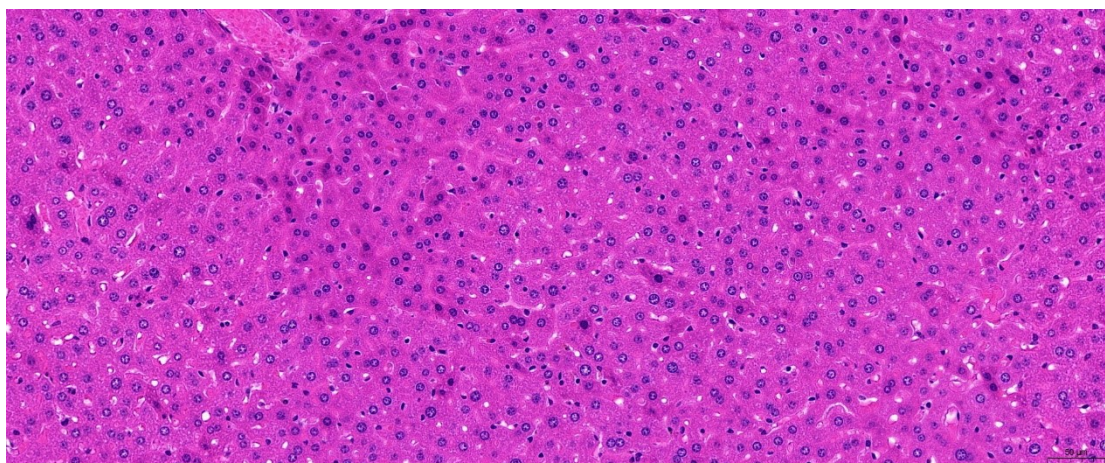

**Liver-DDP:**

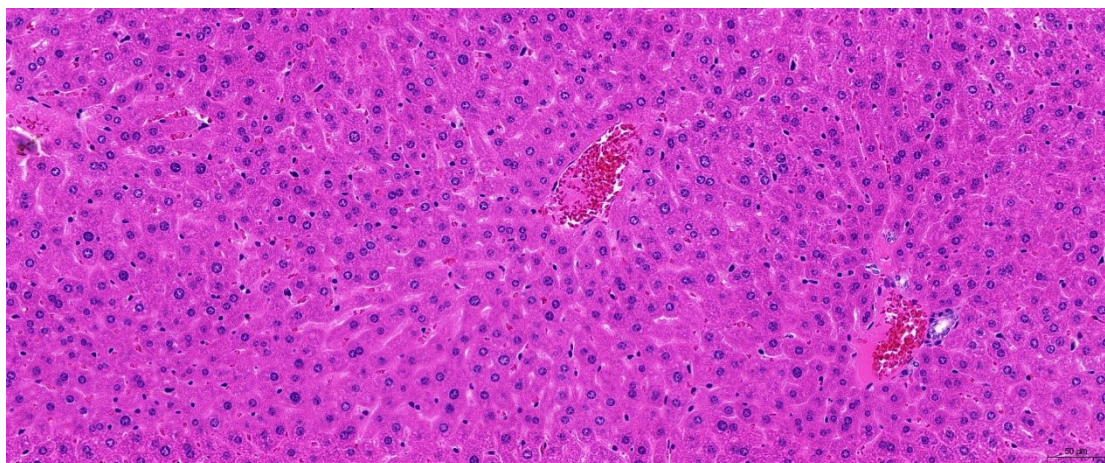

**Liver-compound 2f:**

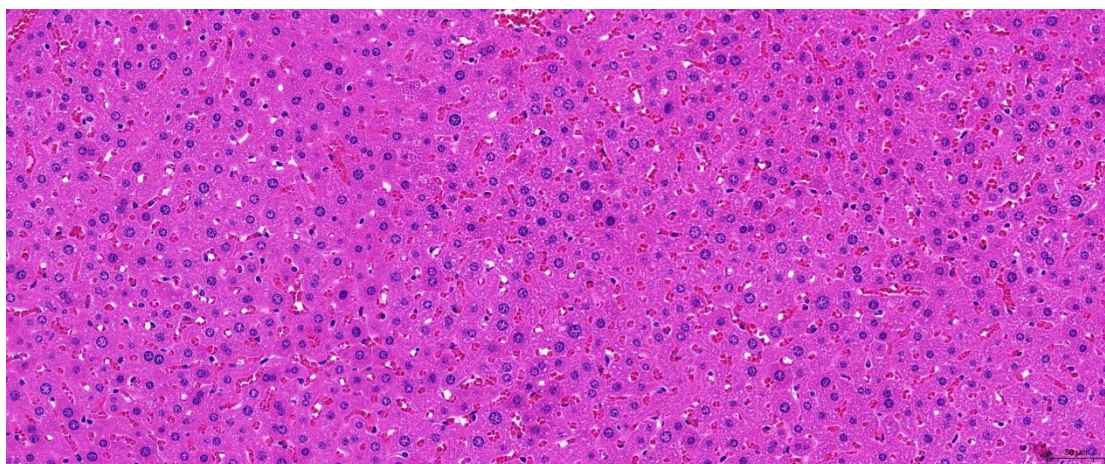



**Spleen-Ctrl:**

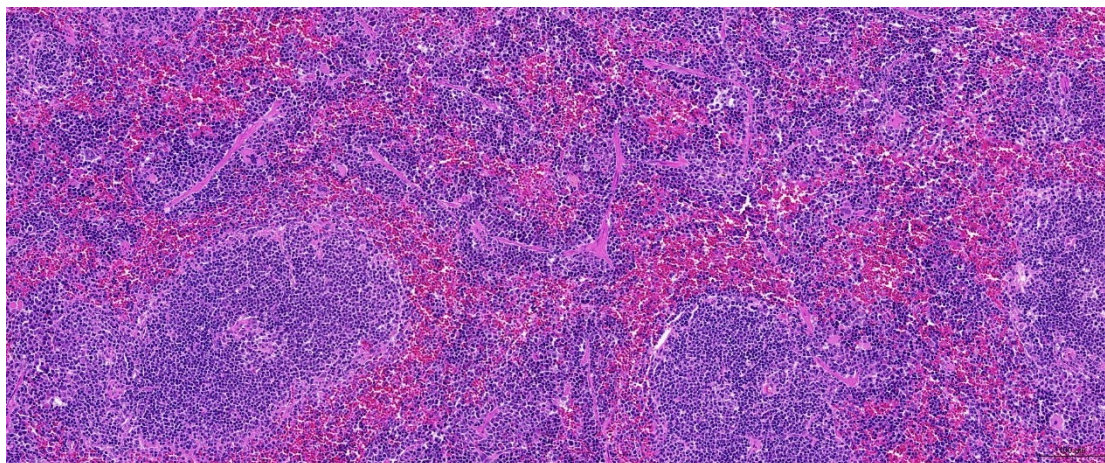

**Spleen-DDP:**

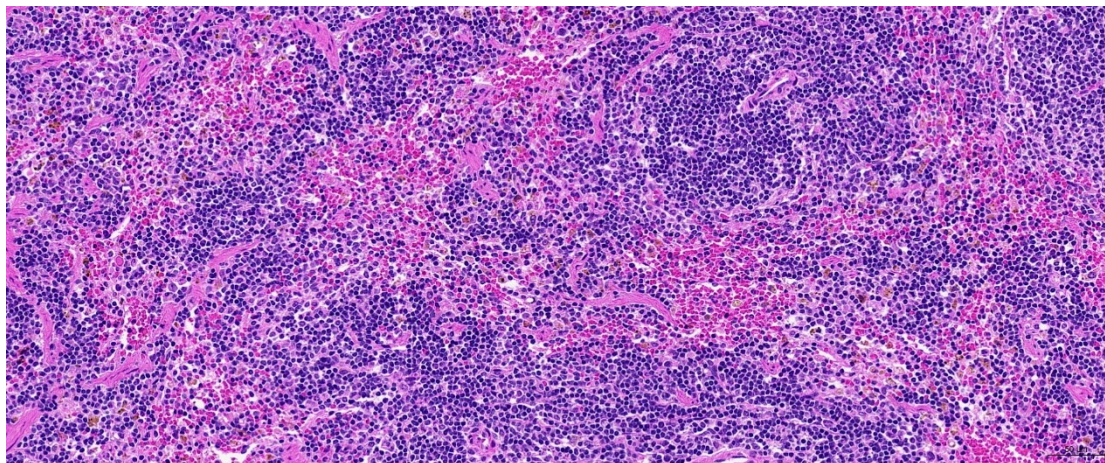

**Spleen-compound 2f:**

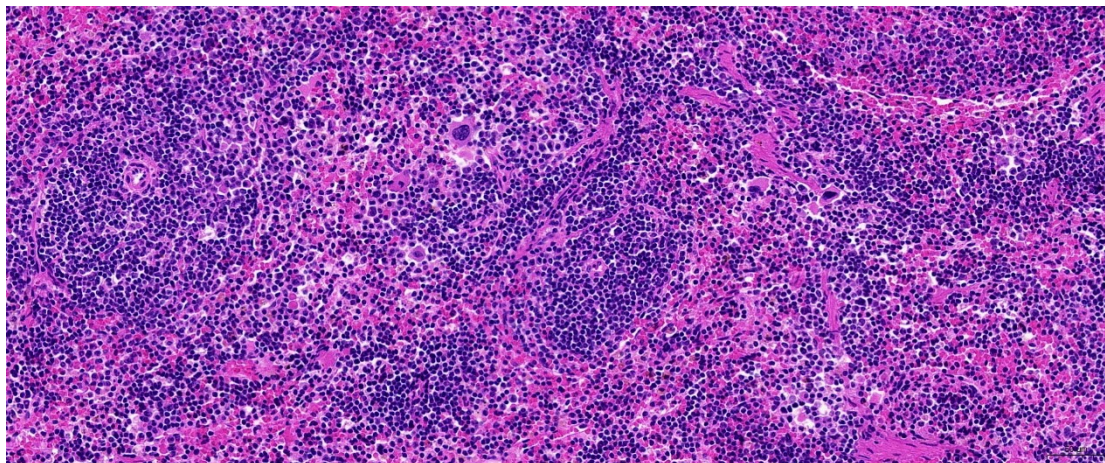



**Lung-Ctrl:**

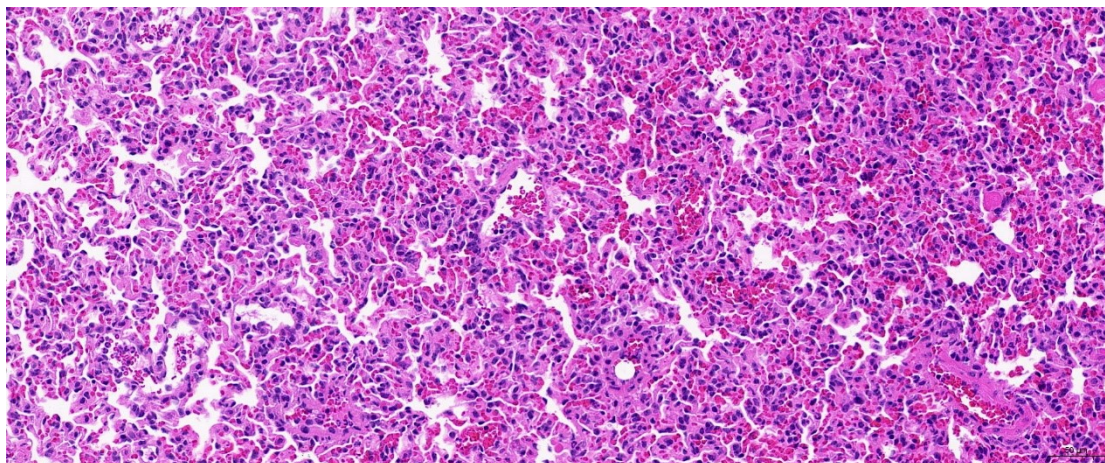

**Lung-DDP:**

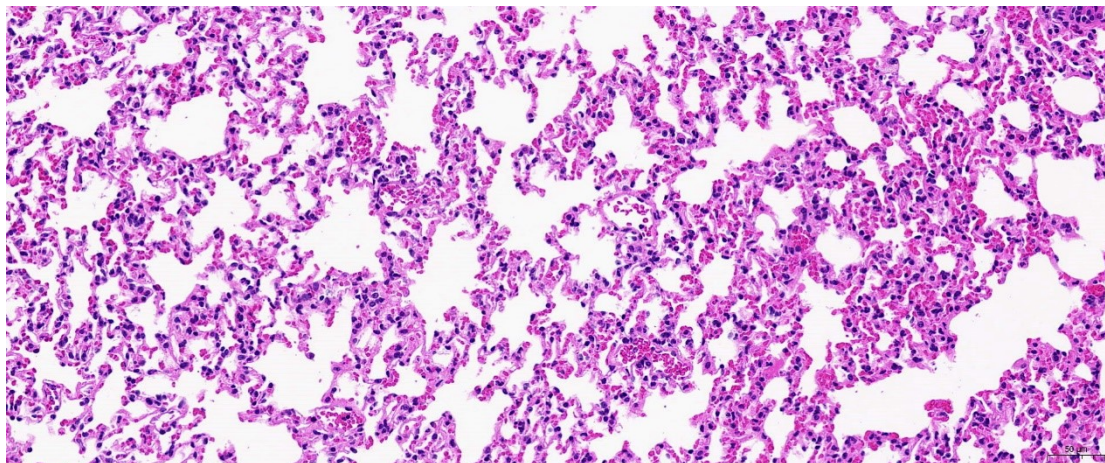

**Lung-compound 2f:**

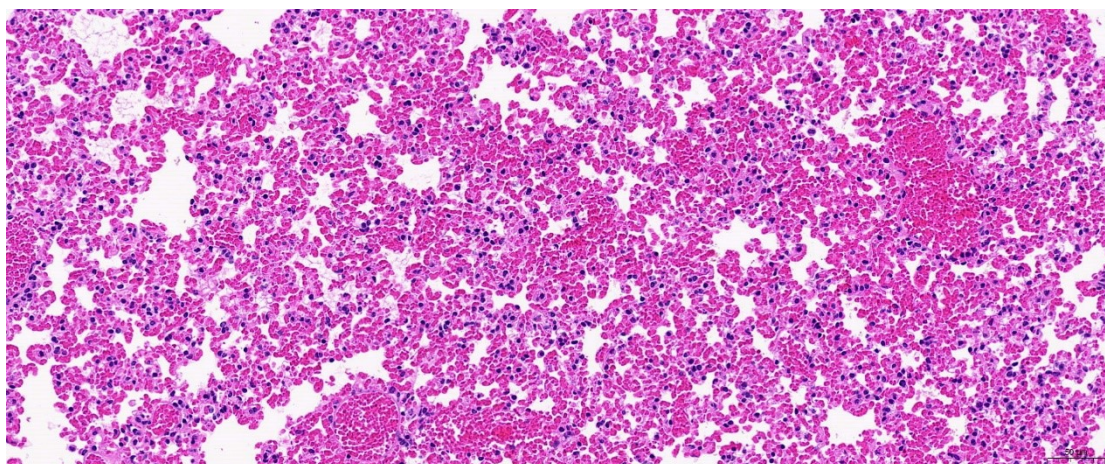



**Kidney-Ctrl:**

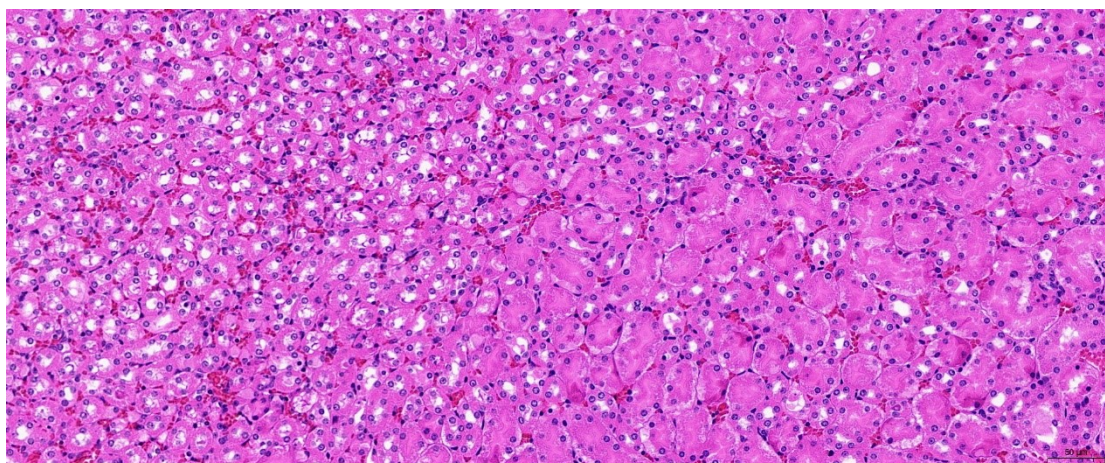

**Kidney-DDP:**

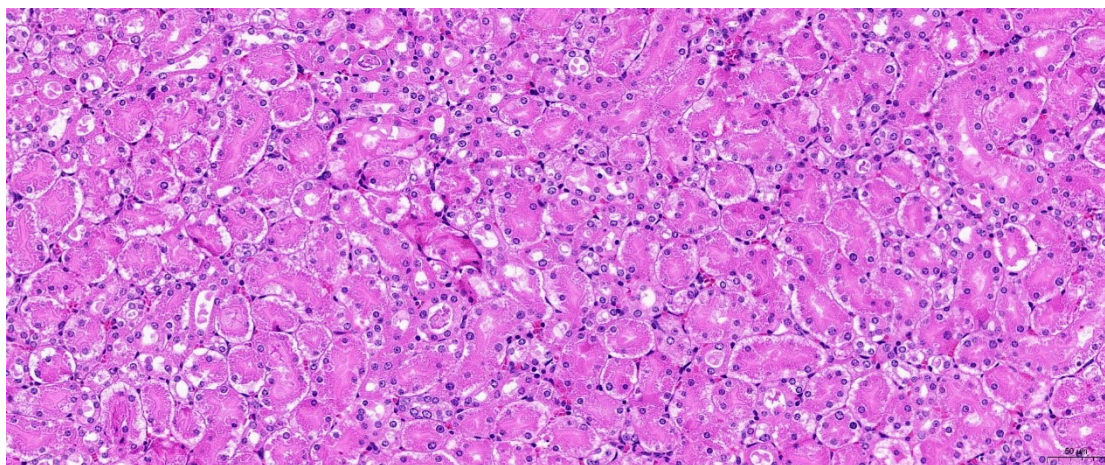

**Kidney-compound 2f:**

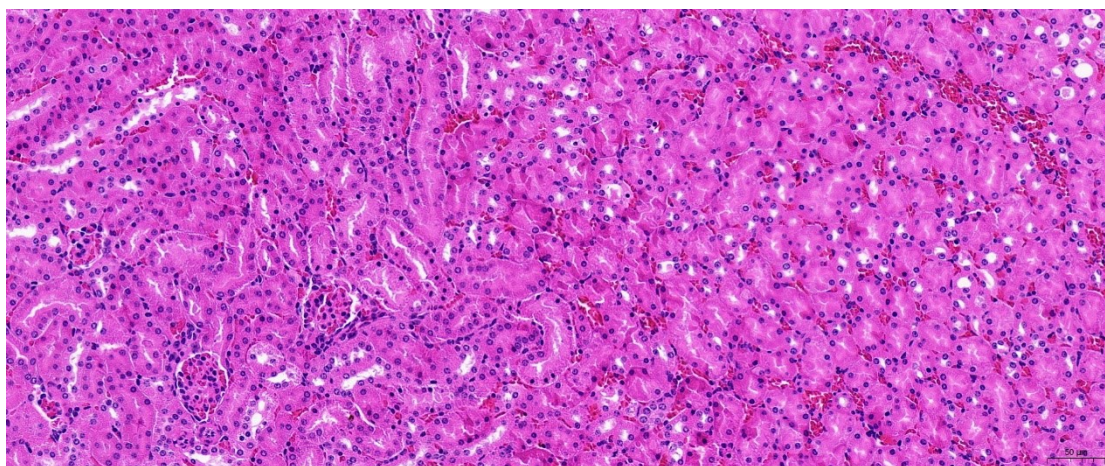

Supplement: d5ra04625d3.pdf [file d5ra04625d3.pdf]
