# Supplementary figures and images for: Novel bakuchiol derivatives inhibit the migration and invasion of non-small cell lung cancer by suppressing epithelial-to-mesenchymal transition
Source: Royal Society of Chemistry journal article supplement (doi:10.1039/d5ra04625d), 2025-01-01

**E-cadherin-Ctrl:**

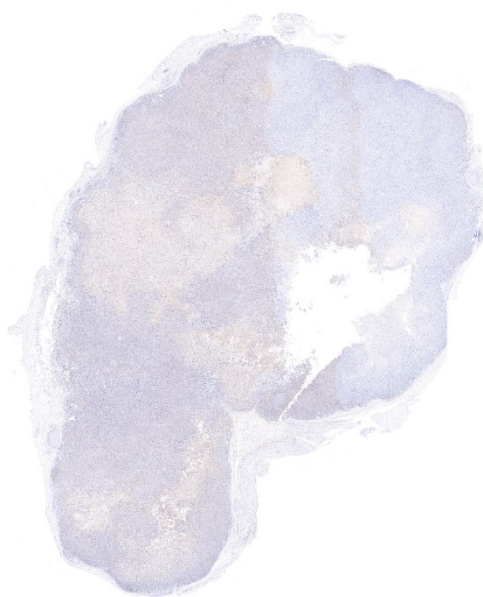

2000  $\mu$ m

**E-cadherin-compound 2f:**

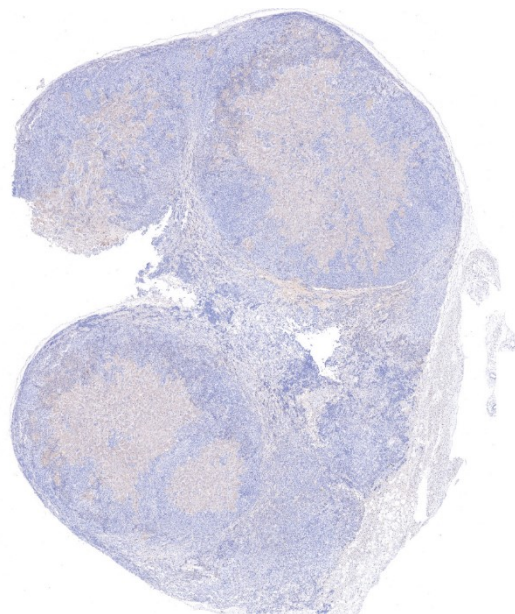

1000  $\mu$ m

**Vimentin-Ctrl:**

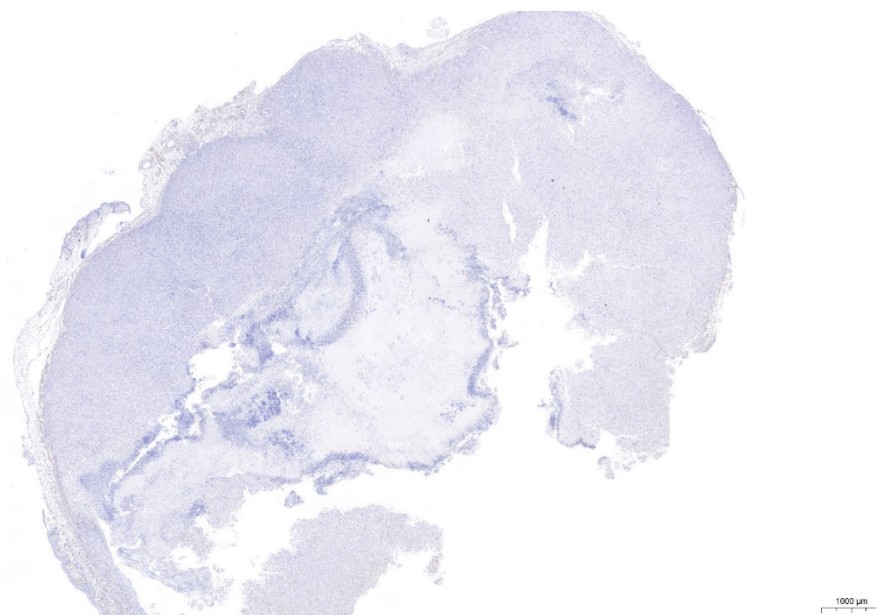

**Vimentin-compound 2f:**

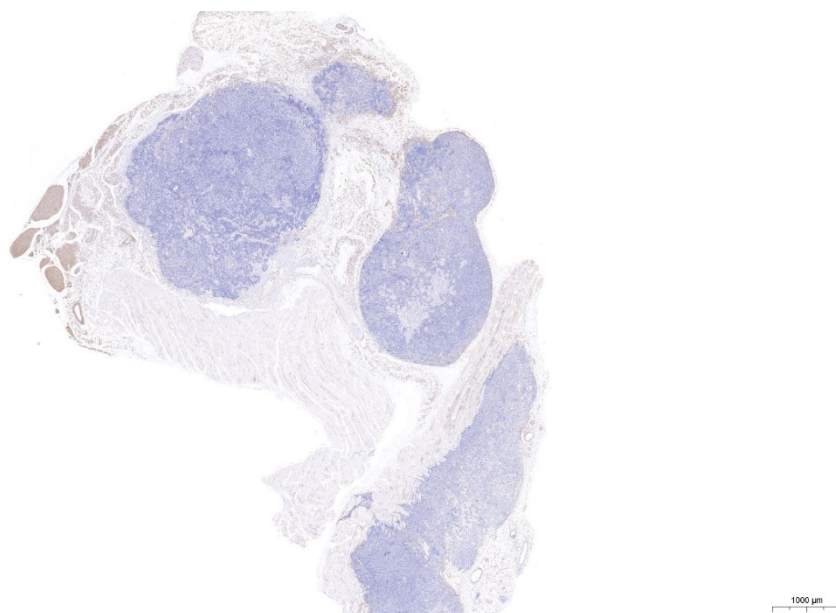

Supplement: d5ra04625d2.pdf [file d5ra04625d2.pdf]

**E-cadherin-Ctrl:**

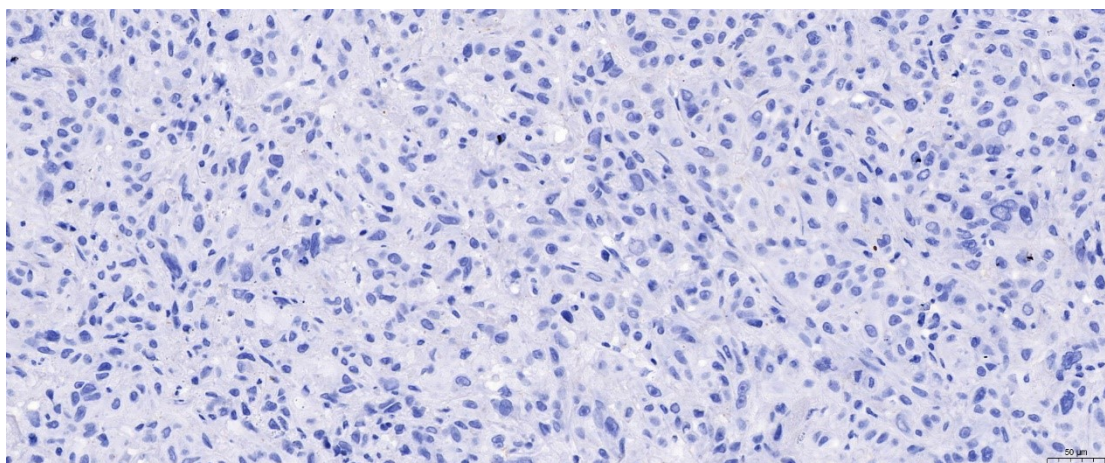

**E-cadherin-compound 2f:**

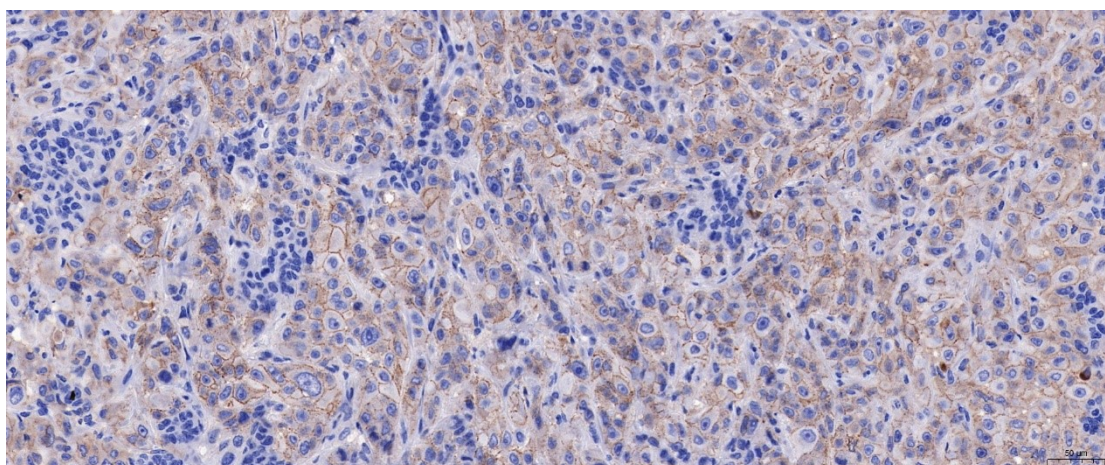



**Vimentin-Ctrl:**

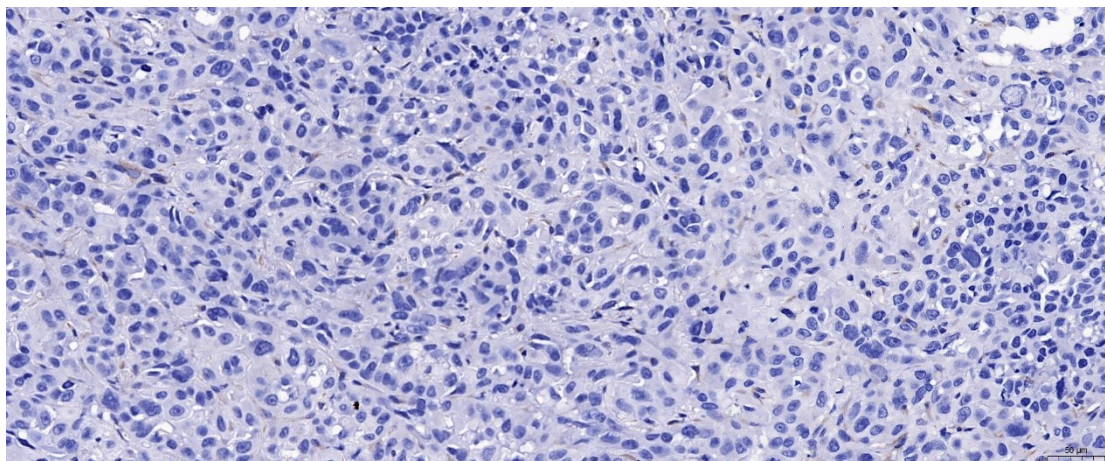

**Vimentin-compound 2f:**

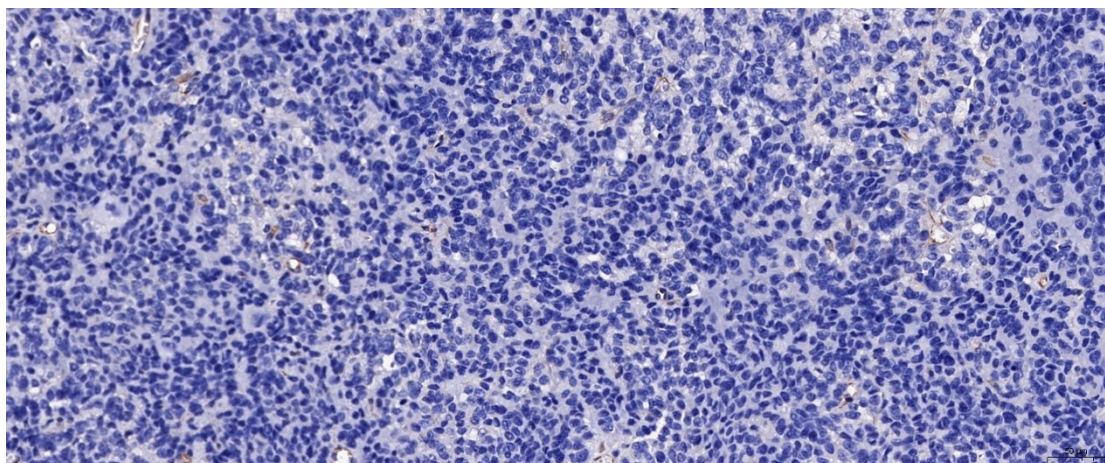

Supplement: d5ra04625d4.pdf [file d5ra04625d4.pdf]

**E-cadherin:**

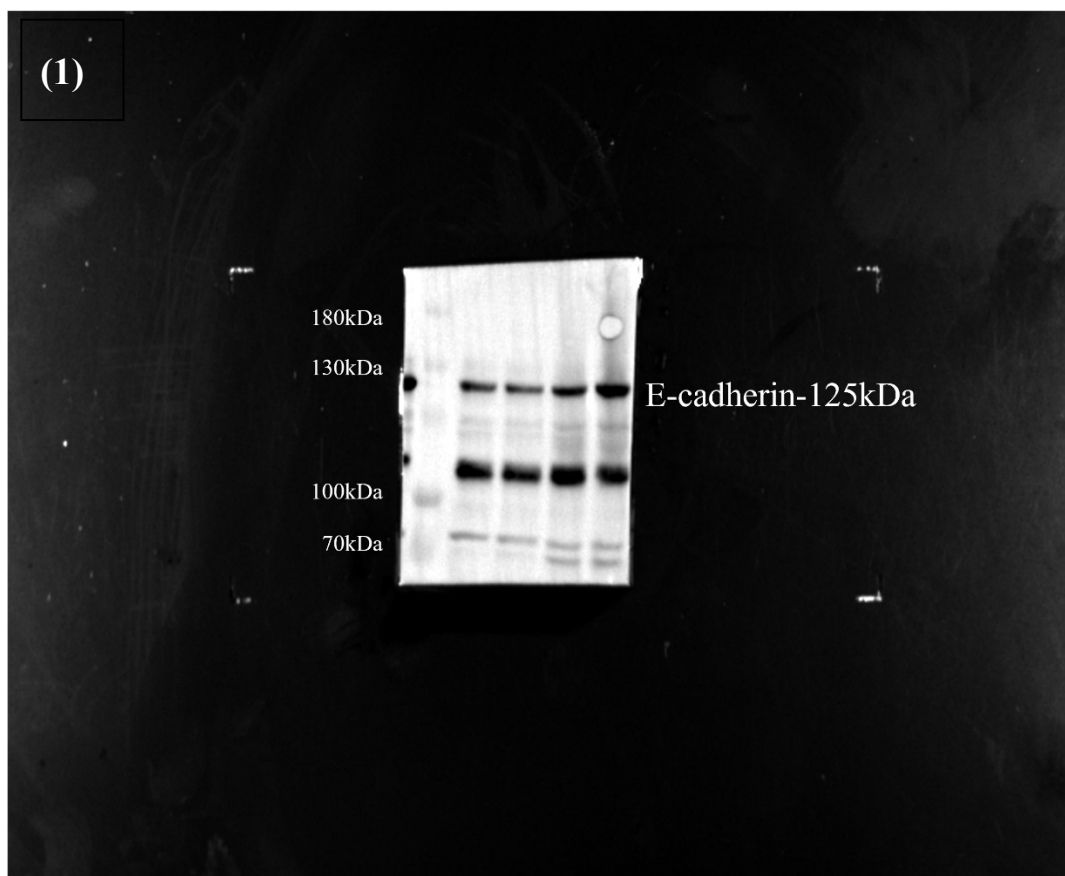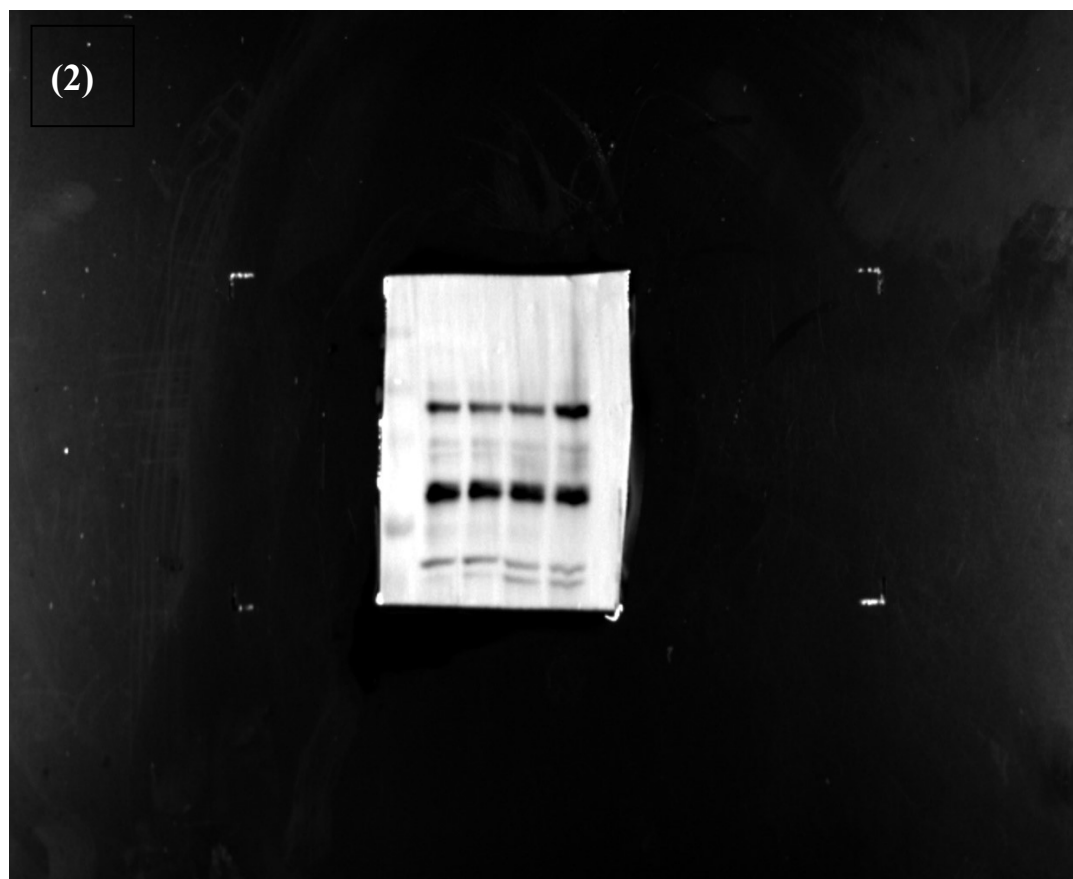

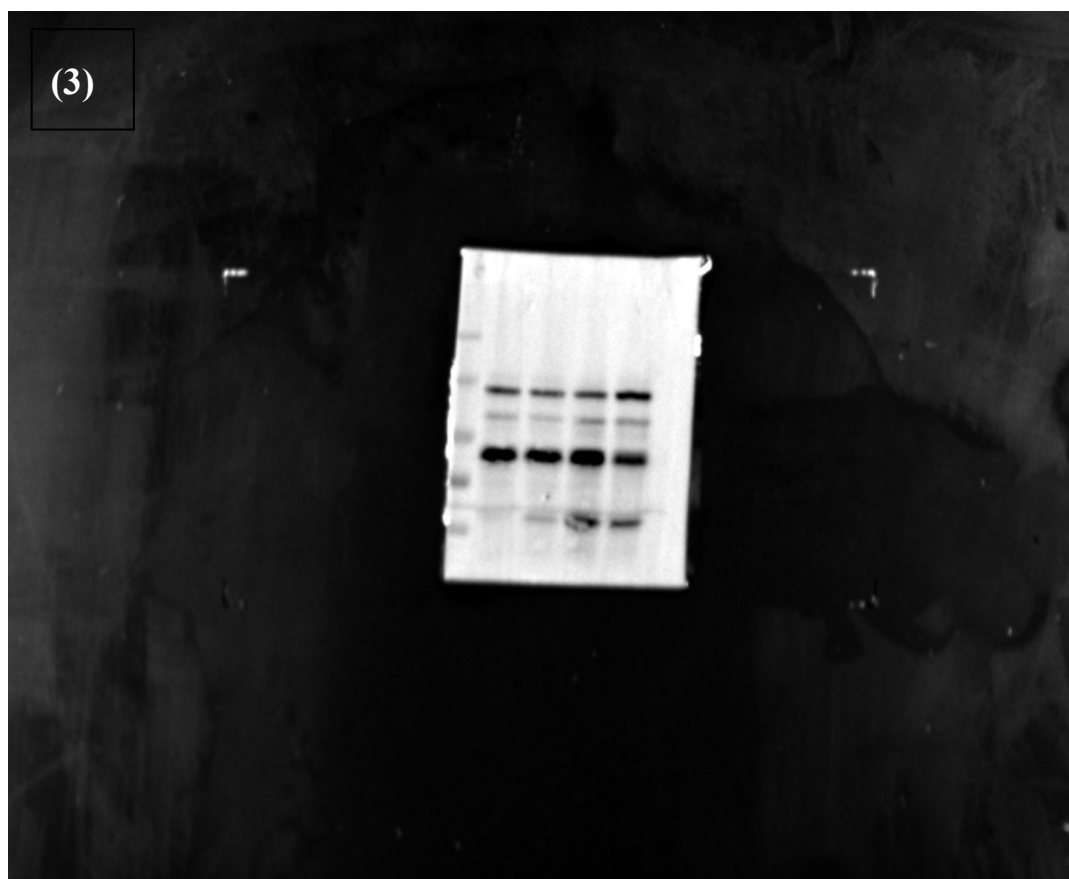

**Tubulin:**

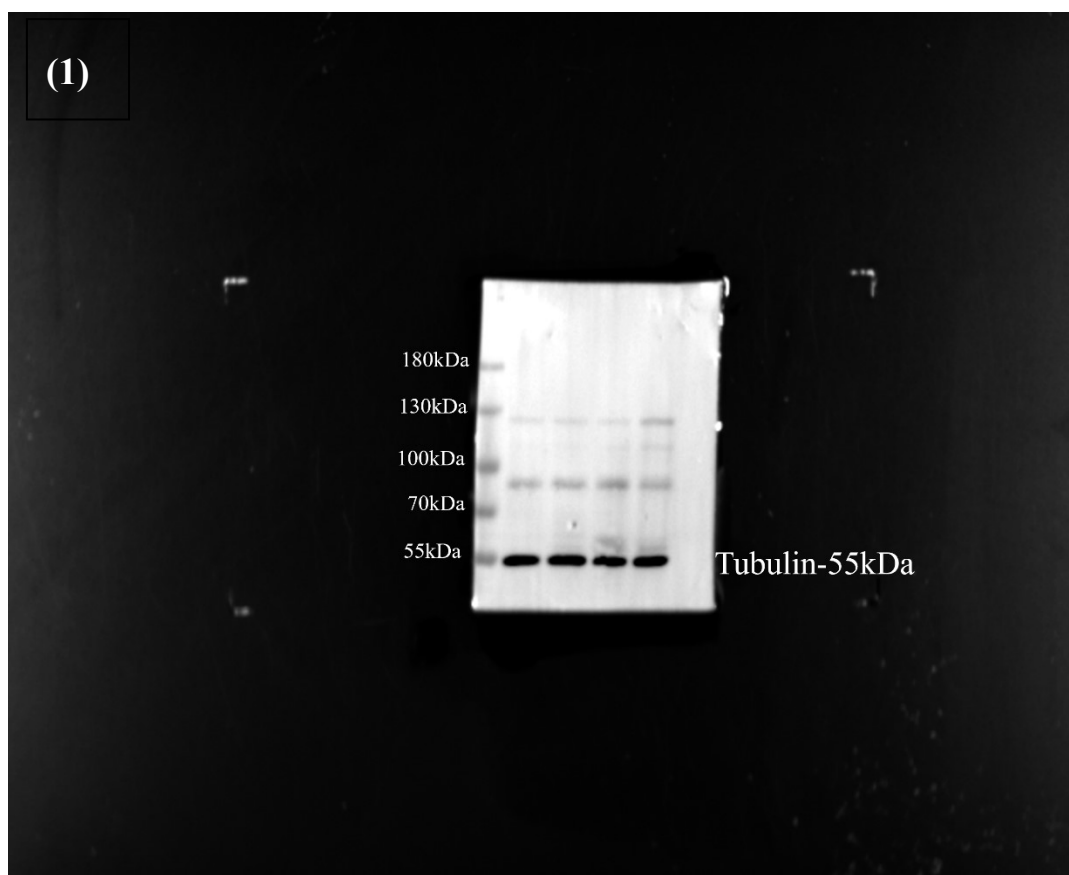

(2)

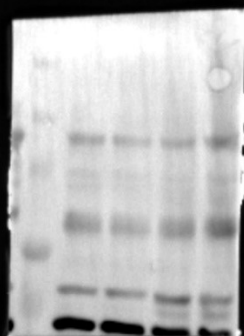

(3)

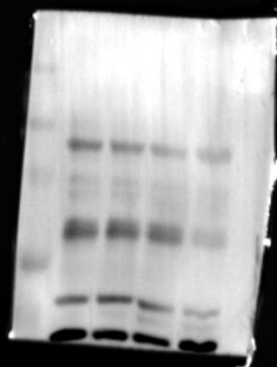

Supplement: d5ra04625d6.pdf [file d5ra04625d6.pdf]
